# Supplementary material for: Therapeutic plasma exchange clears circulating soluble PD-L1 and PD-L1-positive extracellular vesicles
Source: PubMed Central journal article supplement — J Immunother Cancer. 2020 Aug 17;8(2):e001113. doi: 10.1136/jitc-2020-001113 (PMC7437945; doi:10.1136/jitc-2020-001113), 2020-08-17
Supplement: jitc-2020-001113supp001.pdf [file jitc-2020-001113supp001.pdf]

## SUPPLEMENTAL TABLES

Supplemental Table 1. Extracellular forms of PD-L1 and outcomes in multiple malignancies.

|                             | High sPD-L1 prognosis                                                                                                                                                                                       | PD-L1 protein-to-mRNA prognosis <sup>1</sup> | First Line IO                                                                                             | Non-First Line IO                 |
|-----------------------------|-------------------------------------------------------------------------------------------------------------------------------------------------------------------------------------------------------------|----------------------------------------------|-----------------------------------------------------------------------------------------------------------|-----------------------------------|
| <b>Adrenocortical</b>       |                                                                                                                                                                                                             | ↑                                            |                                                                                                           |                                   |
| <b>Bladder</b>              |                                                                                                                                                                                                             | ↑                                            | Cisplatin-ineligible CPS10: P <sup>2</sup> A <sup>3</sup>                                                 | P <sup>2</sup> N <sup>4</sup>     |
| <b>Breast</b>               | Poor <sup>5</sup>                                                                                                                                                                                           | ↑                                            | TNBC unresectable PD-L1 > 1%: A <sup>3</sup>                                                              |                                   |
| <b>Biliary</b>              | Poor <sup>6</sup>                                                                                                                                                                                           |                                              |                                                                                                           |                                   |
| <b>Cervical</b>             |                                                                                                                                                                                                             | ↗                                            |                                                                                                           | P <sup>2</sup>                    |
| <b>Colon</b>                |                                                                                                                                                                                                             |                                              | MSI-high: P <sup>2</sup>                                                                                  |                                   |
| <b>Gastric</b>              | Mainly poor <sup>7-11</sup><br>Poor in IO <sup>12</sup><br>Poor with EVs <sup>13</sup>                                                                                                                      | ↓                                            |                                                                                                           | P <sup>2</sup>                    |
| <b>Glioma (low-grade)</b>   |                                                                                                                                                                                                             | ↑                                            |                                                                                                           |                                   |
| <b>Head/Neck SCC</b>        |                                                                                                                                                                                                             | ↗                                            | P <sup>2</sup>                                                                                            | N <sup>4</sup>                    |
| <b>Hepatocellular</b>       | Poor DFS and OS <sup>14-18</sup> or equivocal <sup>19</sup>                                                                                                                                                 | ↑                                            |                                                                                                           | P <sup>2</sup> N <sup>4</sup>     |
| <b>Lung</b>                 | Poor <sup>20-23</sup> Poor response in IO <sup>12,24,25</sup>                                                                                                                                               |                                              | Metastatic NSCLC no muts: P <sup>2</sup> A <sup>3</sup><br>SCLC: A <sup>3</sup>                           | P <sup>2</sup> N <sup>4</sup>     |
| <b>Lymphoma</b>             | BCL poor OS <sup>26</sup> poor response <sup>27</sup> decrease on tx positive <sup>28</sup><br>HL poor PFS <sup>29</sup><br>PTCL poor OS/PFS/response <sup>30,31</sup><br>NK/T poor OS/PFS <sup>32,33</sup> | ↗                                            |                                                                                                           | HL: P <sup>2</sup> N <sup>4</sup> |
| <b>Melanoma</b>             | Poor <sup>34</sup><br>Poor in IO <sup>35</sup>                                                                                                                                                              | ↗                                            | Unresectable/metastatic: P <sup>2</sup> N <sup>4</sup><br>Adjuvant if LNs after resection: P <sup>2</sup> |                                   |
| <b>Mesothelioma</b>         |                                                                                                                                                                                                             | ↑                                            |                                                                                                           |                                   |
| <b>Myeloma</b>              | Poor PFS <sup>36,37</sup>                                                                                                                                                                                   |                                              |                                                                                                           |                                   |
| <b>Ovarian (epithelial)</b> | Poor OS and PFS in cisplatin-resp <sup>38</sup>                                                                                                                                                             |                                              |                                                                                                           |                                   |
| <b>Pancreatic</b>           | Decrease on tx positive <sup>39</sup>                                                                                                                                                                       |                                              |                                                                                                           |                                   |
| <b>Prostate</b>             |                                                                                                                                                                                                             | ↗                                            |                                                                                                           |                                   |
| <b>Rectal</b>               | Poor DFS <sup>40</sup>                                                                                                                                                                                      |                                              |                                                                                                           |                                   |
| <b>Renal</b>                |                                                                                                                                                                                                             | ↗                                            | Advanced with axitinib: P <sup>2</sup>                                                                    | N <sup>4</sup>                    |
| <b>Sarcoma</b>              |                                                                                                                                                                                                             | ↑                                            |                                                                                                           |                                   |

Supplemental Table 1. Extracellular PD-L1 and survival. Cancers for which serum sPD-L1 and/or PD-L1 protein-to-mRNA ratios affect(s) prognosis in a previous study of Cancer Genome

Atlas (TCGA) data (increased improves survival)<sup>1</sup> and/or in which first-line or common second-line PD-(L)1 inhibitor therapy is FDA approved as a partial list. OS: overall survival. PFS: progression-free survival. IO: immunotherapy. A: atezolizumab. N: nivolumab. P: pembrolizumab. References:

1. Orme, J. et al. ADAM10 and ADAM17 cleave PD-L1 to mediate PD-(L)1 inhibitor resistance. *Oncoimmunology* **In press**, DOI 10.1080/2162402X.2020.1744980 (2020).
2. *Keytruda: Highlights of Prescribing Information*. (2017).
3. Genentech. *Atezolizumab: Highlights of Prescribing Information*. (2018).
4. *Nivolumab: Highlights of Prescribing Information*. (2018).
5. Li, Y. et al. Serum sPD-1 and sPD-L1 as Biomarkers for Evaluating the Efficacy of Neoadjuvant Chemotherapy in Triple-Negative Breast Cancer Patients. *Clin. Breast Cancer* **19**, 326-332.e1 (2019).
6. Ha, H. et al. Soluble programmed death-ligand 1 (sPDL1) and neutrophil-to-lymphocyte ratio (NLR) predicts survival in advanced biliary tract cancer patients treated with palliative chemotherapy. *Oncotarget* **7**, 76604–76612 (2016).
7. Zheng, Z. et al. Level of circulating PD-L1 expression in patients with advanced gastric cancer and its clinical implications. *Chin. J. Cancer Res.* **26**, 104–11 (2014).
8. Ito, M. et al. Is high serum programmed death ligand 1 level a risk factor for poor survival in patients with gastric cancer? *Ann. Gastroenterol. Surg.* (2018). doi:10.1002/ags3.12175
9. Bang, Y.-J. et al. Relationship between PD-L1 expression and clinical outcomes in patients with advanced gastric cancer treated with the anti-PD-1 monoclonal antibody pembrolizumab (MK-3475) in KEYNOTE-012. *J. Clin. Oncol.* **33**, 4001 (2015).
10. Shigemori, T. et al. Soluble PD-L1 Expression in Circulation as a Predictive Marker for Recurrence and Prognosis in Gastric Cancer: Direct Comparison of the Clinical Burden Between Tissue and Serum PD-L1 Expression. *Ann. Surg. Oncol.* **26**, 876–883 (2019).
11. Choi, Y. Y. et al. Microsatellite Instability and Programmed Cell Death-Ligand 1 Expression in Stage II/III Gastric Cancer: Post Hoc Analysis of the CLASSIC Randomized Controlled study. *Ann. Surg.* **270**, 309–316 (2019).
12. Ando, K. et al. Plasma Levels of Soluble PD-L1 Correlate With Tumor Regression in Patients With Lung and Gastric Cancer Treated With Immune Checkpoint Inhibitors. *Anticancer Res.* **39**, 5195–5201 (2019).
13. Fan, Y. et al. Exosomal PD-L1 Retains Immunosuppressive Activity and is Associated with Gastric Cancer Prognosis. *Ann. Surg. Oncol.* **26**, 3745–3755 (2019).
14. Finkelmeier, F. et al. High levels of the soluble programmed death-ligand (sPD-L1) identify hepatocellular carcinoma patients with a poor prognosis. *Z. Gastroenterol.* **53**, A4\_19 (2015).
15. El-Gebaly, F. et al. Study of Serum Soluble Programmed Death Ligand 1 as a prognostic Factor in Hepatocellular Carcinoma in Egyptian Patients. *Curr. Cancer Drug Targets* (2019). doi:10.2174/1568009619666190718141647
16. Chang, B. et al. The correlation and prognostic value of serum levels of soluble programmed death protein 1 (sPD-1) and soluble programmed death-ligand 1 (sPD-L1) in patients with hepatocellular carcinoma. *Cancer Immunol. Immunother.* **68**, 353–363 (2019).
17. Han, X. et al. Pre-treatment serum levels of soluble programmed cell death-ligand 1 predict prognosis in patients with hepatitis B-related hepatocellular carcinoma. *J. Cancer Res. Clin. Oncol.* **145**, 303–312 (2019).

18. Kim, H. J., Park, S., Kim, K.-J. & Seong, J. Clinical significance of soluble programmed cell death ligand-1 (sPD-L1) in hepatocellular carcinoma patients treated with radiotherapy. *Radiother. Oncol.* **129**, 130–135 (2018).
19. Elmezayen, H. A. *et al.* Clinical role of serum programmed death ligand 1 in patients with hepatocellular carcinoma: Where does it come from? *Surg. Today* (2019). doi:10.1007/s00595-019-01920-8
20. Okuma, Y. *et al.* High plasma levels of soluble programmed cell death ligand 1 are prognostic for reduced survival in advanced lung cancer. *Lung Cancer* **104**, 1–6 (2017).
21. Zhang, J. *et al.* Circulating PD-L1 in NSCLC patients and the correlation between the level of PD-L1 expression and the clinical characteristics. *Thorac. Cancer* **6**, 534–538 (2015).
22. Costantini, A. *et al.* Predictive role of plasmatic biomarkers in advanced non-small cell lung cancer treated by nivolumab. *Oncoimmunology* e1452581 (2018). doi:10.1080/2162402X.2018.1452581
23. Zhao, J. *et al.* Plasma levels of soluble programmed death ligand-1 may be associated with overall survival in nonsmall cell lung cancer patients receiving thoracic radiotherapy. *Medicine (Baltimore)*. **96**, e6102 (2017).
24. Costantini, A. *et al.* Predictive role of plasmatic biomarkers in advanced non-small cell lung cancer treated by nivolumab. *Oncoimmunology* **7**, e1452581 (2018).
25. Okuma, Y. *et al.* Soluble Programmed Cell Death Ligand 1 as a Novel Biomarker for Nivolumab Therapy for Non-Small-cell Lung Cancer. *Clin. Lung Cancer* **19**, 410-417.e1 (2018).
26. Rossille, D. *et al.* High level of soluble programmed cell death ligand 1 in blood impacts overall survival in aggressive diffuse large B-Cell lymphoma: results from a French multicenter clinical trial. *Leukemia* **28**, 2367–75 (2014).
27. Rossille, D. *et al.* High level of soluble programmed cell death ligand 1 in blood impacts overall survival in aggressive diffuse large B-Cell lymphoma: results from a French multicenter clinical trial. *Leukemia* **28**, 2367–2375 (2014).
28. El-Ghammaz, A. M. S., Gadallah, H. A., Kamal, G., Maher, M. M. & Mohamad, M. A. Impact of serum soluble programmed death ligand 1 on end of treatment metabolic response of diffuse large B cell lymphoma patients. *Clin. Exp. Med.* **18**, 505–512 (2018).
29. Guo, X. *et al.* High Serum Level of Soluble Programmed Death Ligand 1 is Associated With a Poor Prognosis in Hodgkin Lymphoma. *Transl. Oncol.* **11**, 779–785 (2018).
30. Zhang, X. *et al.* Plasma soluble programmed death ligand 1 levels predict clinical response in peripheral T-cell lymphomas. *Hematol. Oncol.* **37**, 270–276 (2019).
31. Shen, H. *et al.* Soluble programmed death-ligand 1 are highly expressed in peripheral T-cell lymphoma: a biomarker for prognosis. *Hematology* **24**, 392–398 (2019).
32. Bi, X.-W. *et al.* PD-L1 is upregulated by EBV-driven LMP1 through NF- $\kappa$ B pathway and correlates with poor prognosis in natural killer/T-cell lymphoma. *J. Hematol. Oncol.* **9**, 109 (2016).
33. Wang, H. *et al.* High post-treatment serum levels of soluble programmed cell death ligand 1 predict early relapse and poor prognosis in extranodal NK/T cell lymphoma patients. *Oncotarget* **7**, 33035–45 (2016).
34. Dronca, R.; Leontovich, A.; Harrington, S.; Jegapragasan, M.; Kottschade, L.; Nevala, W.; Enninga, E.; Markovic, S.; Dong, H. Soluble PD-L1 (sPD-L1) is associated with decreased survival in metastatic melanoma. *Pigment Cell Melanoma Res.* **28**, 768–769

- (2015).
35. Zhou, J. *et al.* Soluble PD-L1 as a Biomarker in Malignant Melanoma Treated with Checkpoint Blockade. *Cancer Immunol. Res.* **5**, 480–492 (2017).
  36. Wang, L. *et al.* Serum levels of soluble programmed death ligand 1 predict treatment response and progression free survival in multiple myeloma. *Oncotarget* **6**, 41228–36 (2015).
  37. Huang, S.-Y. *et al.* Soluble PD-L1: A biomarker to predict progression of autologous transplantation in patients with multiple myeloma. *Oncotarget* **7**, 62490–62502 (2016).
  38. Buderath, P. *et al.* Soluble Programmed Death Receptor Ligands sPD-L1 and sPD-L2 as Liquid Biopsy Markers for Prognosis and Platinum Response in Epithelial Ovarian Cancer. *Front. Oncol.* **9**, 1015 (2019).
  39. Park, H. *et al.* Prognostic implications of soluble programmed death-ligand 1 and its dynamics during chemotherapy in unresectable pancreatic cancer. *Sci. Rep.* **9**, 11131 (2019).
  40. Tominaga, T. *et al.* Clinical significance of soluble programmed cell death-1 and soluble programmed cell death-ligand 1 in patients with locally advanced rectal cancer treated with neoadjuvant chemoradiotherapy. *PLoS One* **14**, e0212978 (2019).

**Supplemental Table 2. Baseline patient characteristics in the melanoma cohort.**

|               | High sPD-L1<br>(n=216) | Low sPD-L1<br>(n=61) | Statistic                                      |
|---------------|------------------------|----------------------|------------------------------------------------|
| Age, years    | 60 (50, 69)            | 58 (50, 70)          | F=0.10,<br>P = 0.756 <sup>1</sup>              |
| Sex: M        | 137/216 (63)           | 31/60 (52)           | X <sup>2</sup> = 2.73,<br>P=0.10 <sup>2</sup>  |
| Stage         |                        |                      | X <sup>2</sup> = 3.95,<br>P=0.139 <sup>2</sup> |
| M1a           | 31/214 (14.5)          | 14/59 (23.7)         |                                                |
| M1b           | 54/214 (25.2)          | 17/59 (28.8)         |                                                |
| M1c           | 129/214 (60.3)         | 28/59 (47.5)         |                                                |
| sPD-L1, ng/uL | 0.589 (0.370, 3.153)   | 0.216 (0.173, 0.249) | F=272.68<br>P < 0.001 <sup>1</sup>             |
| LDH, U/L      | 209 (168, 395)         | 187 (163, 298)       | F=2.05<br>P = 0.154 <sup>1</sup>               |

**Supplemental Table 2. Baseline patient characteristics in the melanoma cohort.** Patients with melanoma from three studies with retrospective data are compared by starting sPD-L1 level above or below the discovered survival cutoff (0.277ng/mL). Characteristics collected at entry into the study included age in years, sex, stage, sPD-L1, and LDH (lactate dehydrogenase).

<sup>1</sup>Kruskal-Wallis. <sup>2</sup>Pearson.

| <b>Supplemental Table 3. Multivariate analysis in melanoma survival at diagnosis.</b> |                     |                |  |
|---------------------------------------------------------------------------------------|---------------------|----------------|--|
|                                                                                       | <b>Hazard Ratio</b> | <b>P value</b> |  |
| <b>Age &gt; 60 years</b>                                                              | 1.00 (0.76-1.32)    | 0.93           |  |
| <b>Sex: M</b>                                                                         | 1.19 (0.90-1.58)    | 0.25           |  |
| <b>Stage</b>                                                                          |                     |                |  |
| <b>M1a</b>                                                                            | 1                   |                |  |
| <b>M1b</b>                                                                            | 1.42 (0.91-2.23)    | 0.11           |  |
| <b>M1c</b>                                                                            | 1.94 (1.28-2.96)    | 0.002 **       |  |
| <b>sPD-L1 &gt; 277ng/mL</b>                                                           | 1.47 (1.05-2.07)    | 0.025 *        |  |
| <b>LDH &gt; 180U/L</b>                                                                | 1.53 (1.53, 2.11)   | 0.010 **       |  |

**Supplemental Table 3.** Multivariate analysis in melanoma survival at diagnosis. Cox proportional Hazards multivariate analysis was performed.

| <b>Supplemental Table 4. Reduction in EVs by subtype per exchange.</b> |                   |
|------------------------------------------------------------------------|-------------------|
| <b>% Reduction in total EVs per exchange</b>                           | <b>(n=55)</b>     |
| Mean (SD)                                                              | 33.5 (89.4)       |
| Median [Min, Max]                                                      | 60.9 [-468, 99.1] |
| <b>% Reduction PD-L1-positive EVs per exchange</b>                     | <b>(n=13)</b>     |
| Mean (SD)                                                              | 73.1 (14.6)       |
| Median [Min, Max]                                                      | 72.3 [50.0, 98.5] |
| <b>% Reduction in ADAM10-positive EVs per exchange</b>                 | <b>(n=55)</b>     |
| Mean (SD)                                                              | 5.91 (126)        |
| Median [Min, Max]                                                      | 42.4 [-709, 99.5] |

**Supplemental Table 4. Reduction in EVs by subtype per exchange.** Percent reduction in EVs for TPE sessions in which over one million pre-TPE EVs were present (*i.e.* above background noise levels) and no FFP was given.

## SUPPLEMENTAL FIGURES

**Supplemental Figure 1. Baseline plasma sPD-L1 in normal controls versus patients undergoing TPE.**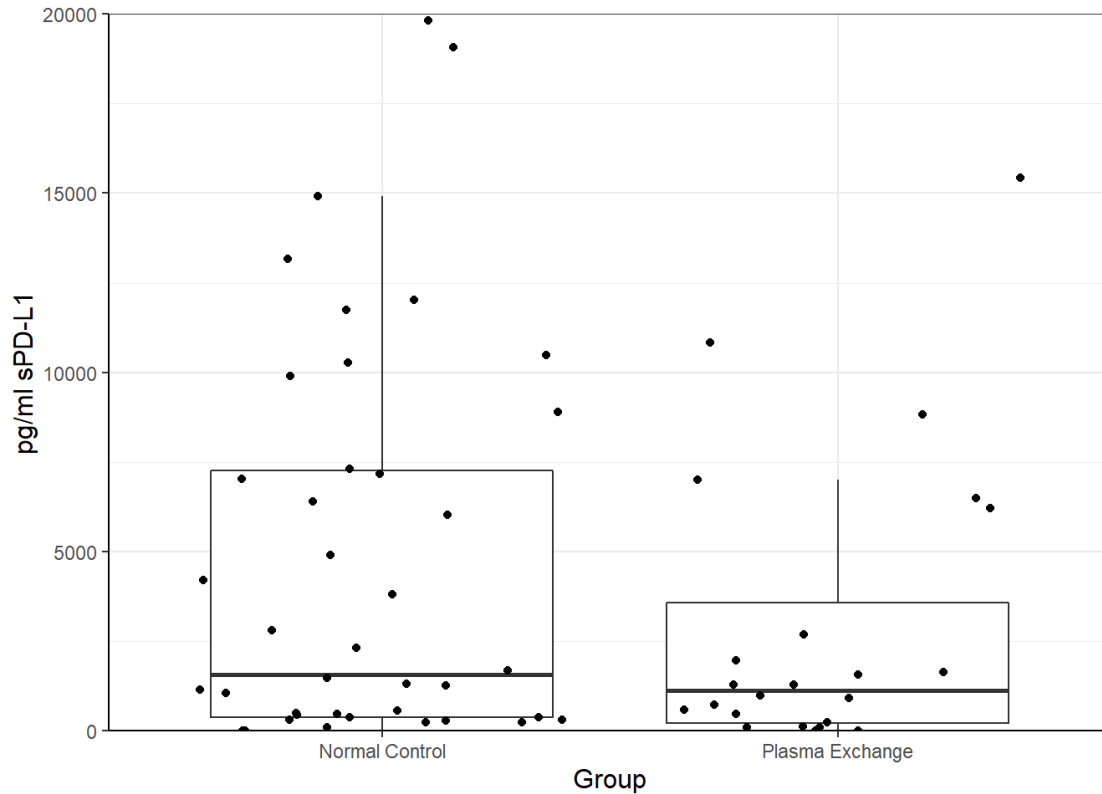

| Baseline plasma sPD-L1 in normal controls versus patients undergoing TPE. |         |        |        |           |           |
|---------------------------------------------------------------------------|---------|--------|--------|-----------|-----------|
|                                                                           | P value | mean   | median | lower95CI | upper95CI |
| Normal Control                                                            | 1       | 8188.0 | 2002.0 | 3167.9    | 13208.1   |
| Plasma Exchange                                                           | 0.1044  | 2898.8 | 1135.5 | 1554.4    | 4243.2    |

**Supplemental Figure 1. Baseline plasma sPD-L1 in normal controls versus patients undergoing TPE.** Levels of PD-L1 in patients undergoing TPE were not significantly lower than those of matched normal controls. Statistical table including p value (two-sided Student's *t* test), mean, and 95% confidence intervals are shown.



**Supplemental Figure 2. Plasma sPD-L1 in all TPE treatment courses (including sessions involving FFP).**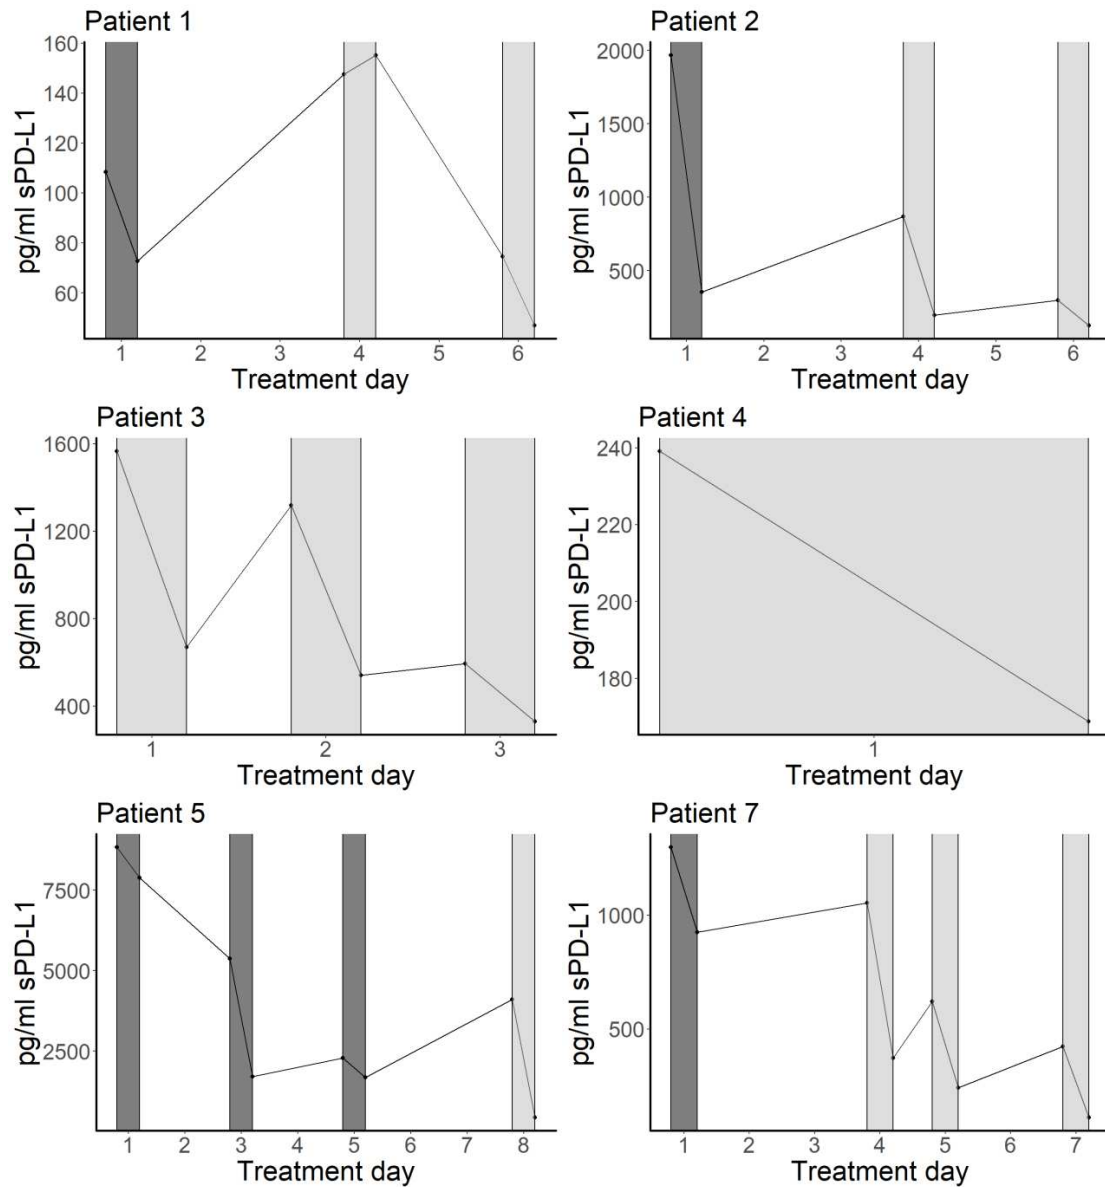

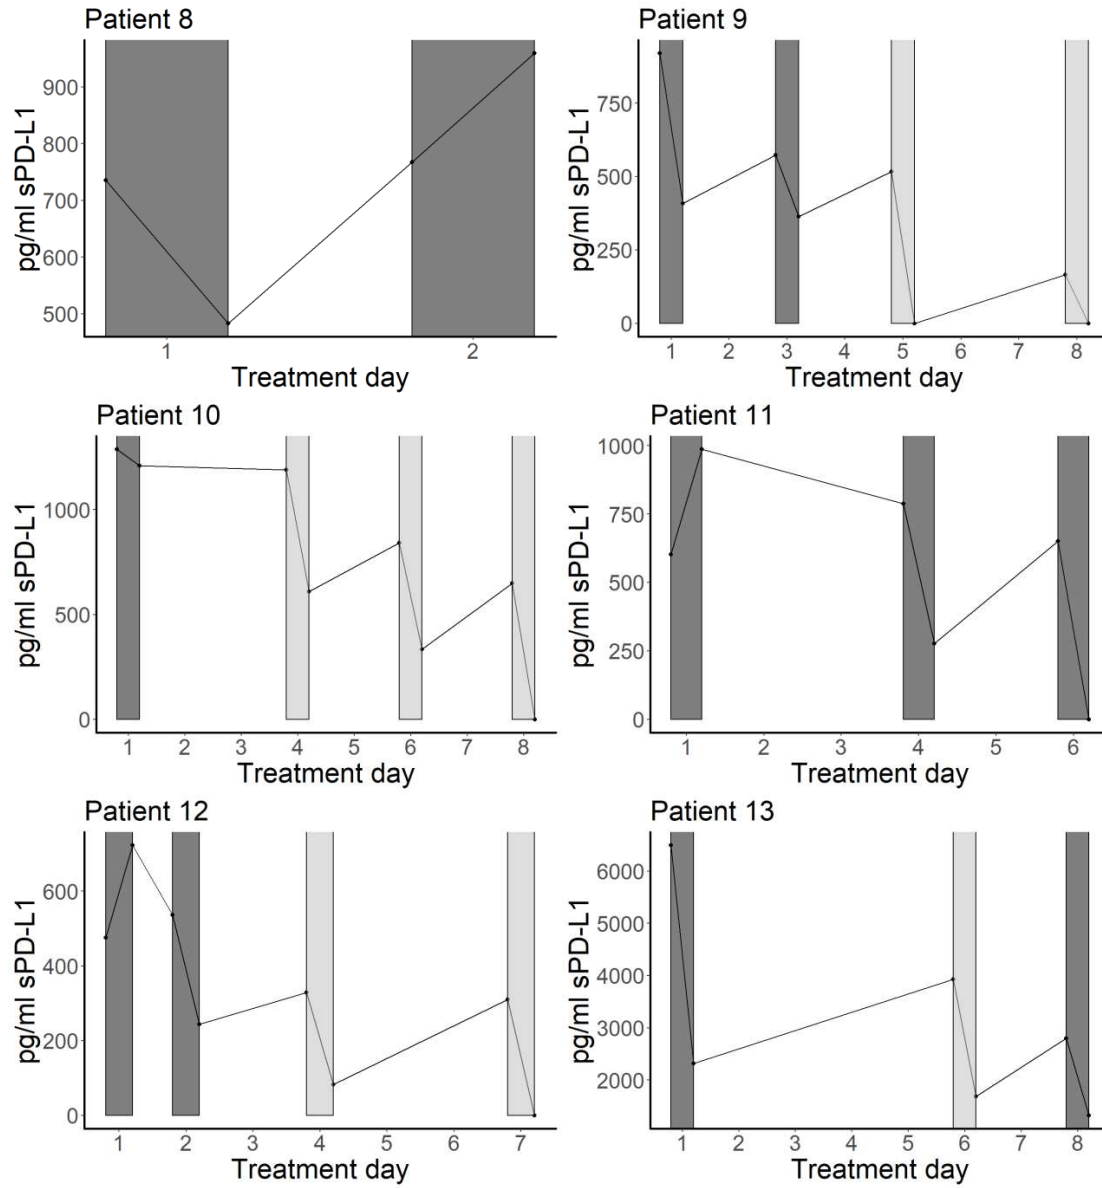

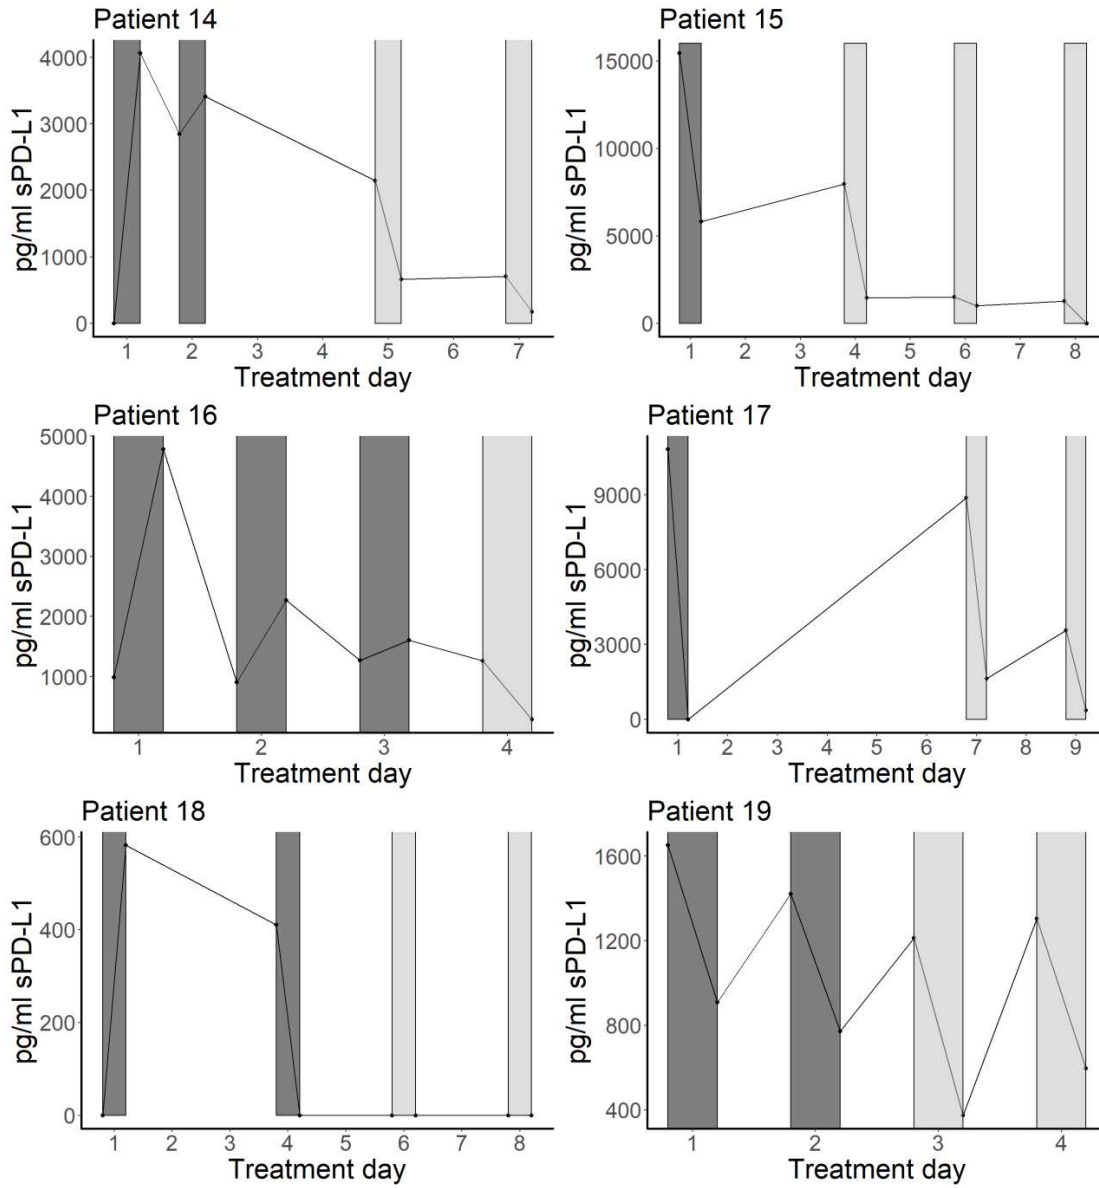

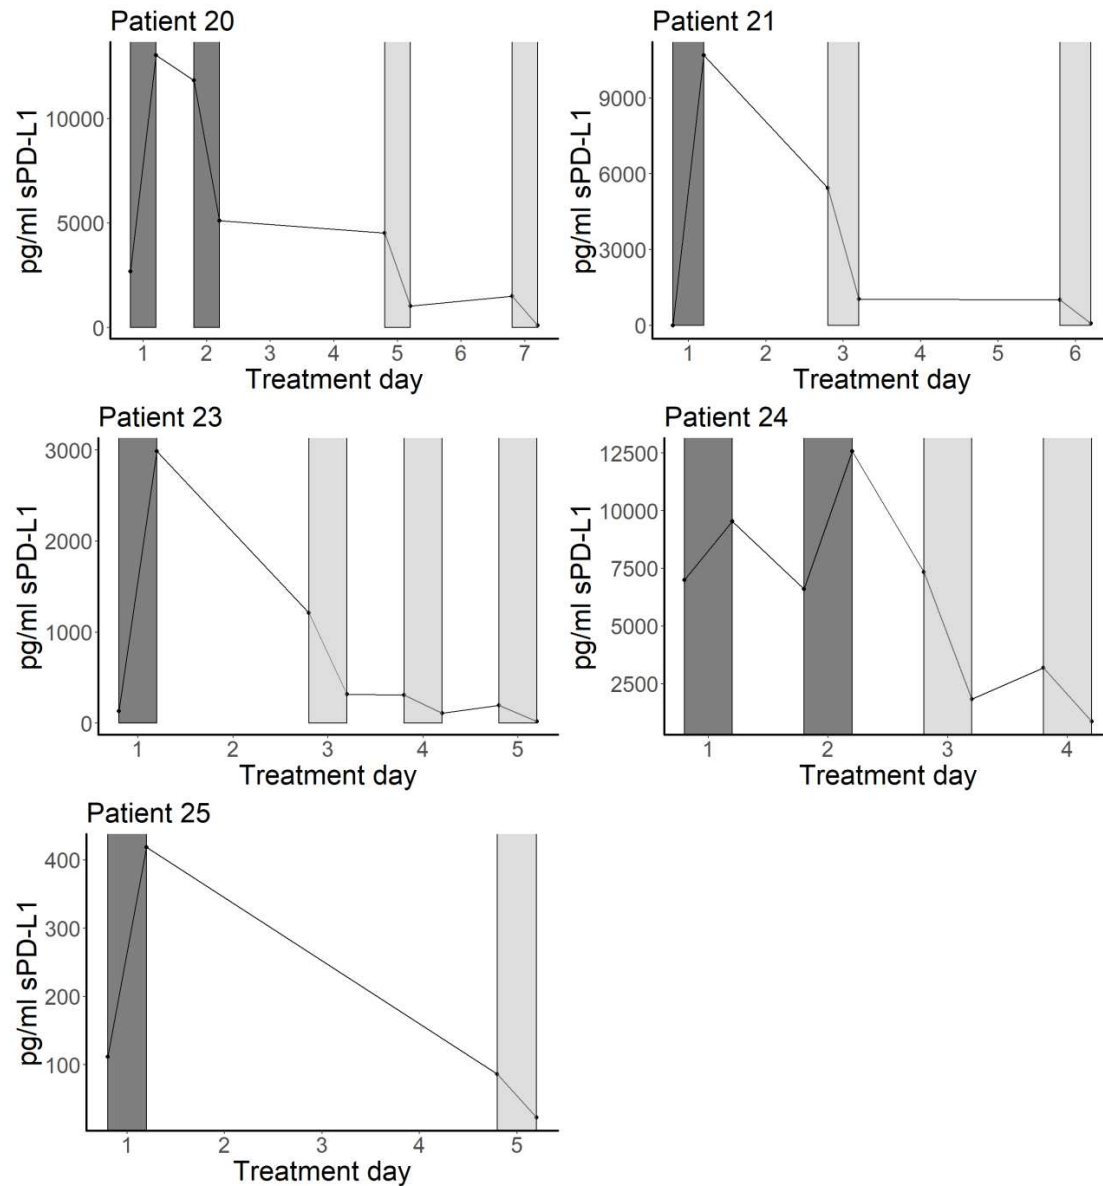

**Supplemental Figure 2. Plasma sPD-L1 in all TPE treatment courses (including sessions involving FFP).** Treatment courses of each patient are shown. Dark gray bars represent TPE sessions in which FFP was given. Light gray bars represent TPE sessions in which no FFP (*i.e.* only albumin) replacement was given. Patient 22 treatment course is shown in Fig 2D. Patient 6 was excluded for biotin use.

**Supplemental Figure 3. Plasma sPD-L1 in all TPE treatment courses (including sessions requiring FFP).**

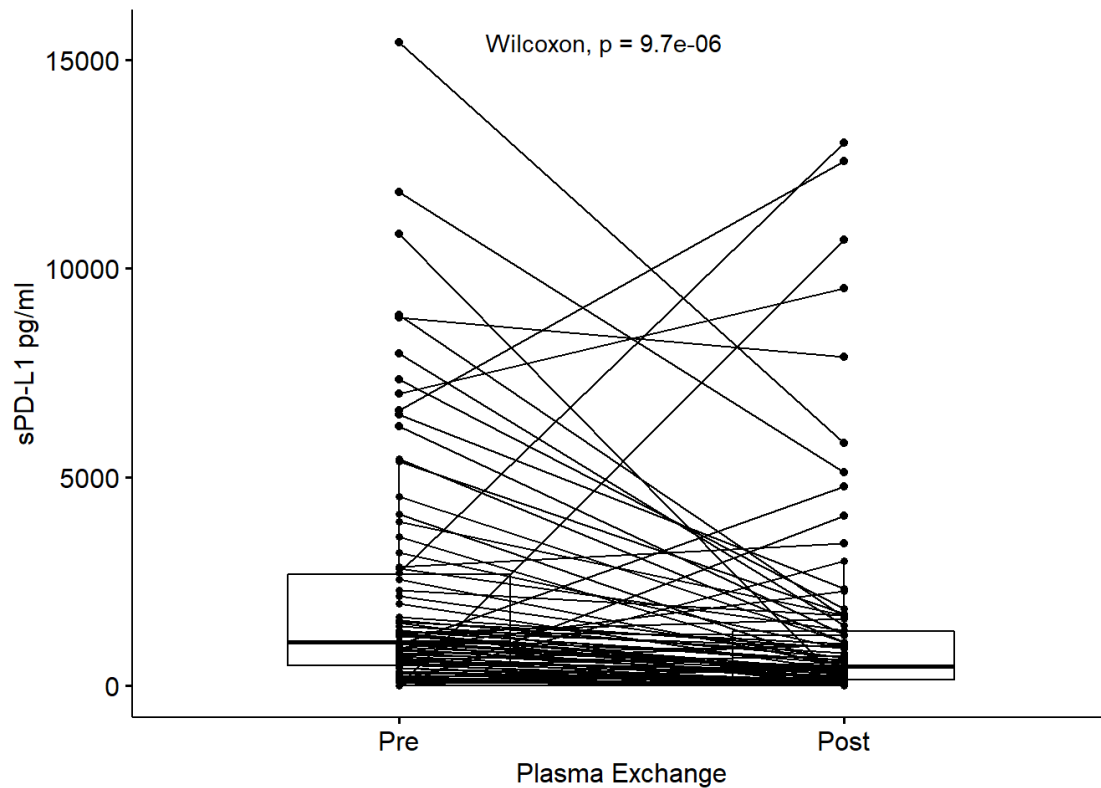

**Supplemental Figure 3. Plasma sPD-L1 in all TPE treatment courses (including sessions requiring FFP).** TPE significantly reduced sPD-L1 levels in all sessions, including those in which patients received donor fresh frozen plasma (FFP).

**Supplemental Figure 4. FFP donor sPD-L1 correlates with blood type.**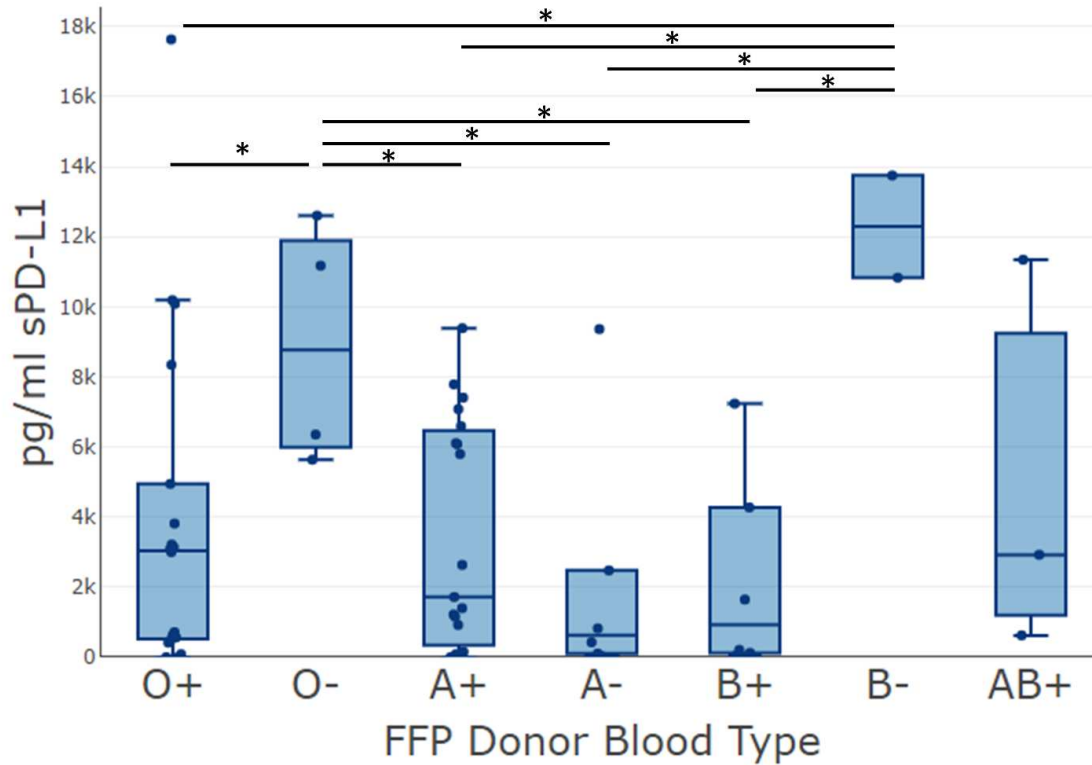

|     | P    | mean  | lower95CI | upper95CI |     | p    | mean  | lower95CI | upper95CI |
|-----|------|-------|-----------|-----------|-----|------|-------|-----------|-----------|
| O+  | 0.05 | 3909  | 2051      | 5767      | O+  | 0.03 | 3909  | 2051      | 5767      |
| O-  | 1    | 8942  | 6093      | 11791     | O-  | 0.22 | 8942  | 6093      | 11791     |
| A+  | 0.04 | 3448  | 2207      | 4689      | A+  | 0.05 | 3448  | 2207      | 4689      |
| A-  | 0.02 | 2205  | 0         | 4636      | A-  | 0.01 | 2205  | 0         | 4636      |
| B+  | 0.02 | 2258  | 293       | 4223      | B+  | 0.02 | 2258  | 293       | 4223      |
| B-  | 0.22 | 12289 | 9890      | 14688     | B-  | 1    | 12289 | 9890      | 14688     |
| AB+ | 0.35 | 4963  | 0         | 10323     | AB+ | 0.14 | 4963  | 0         | 10323     |

**Supplemental Figure 4. FFP donor sPD-L1 correlates with blood type.** Plasma from donors of fresh frozen plasma (FFP) showed variable levels of sPD-L1 by blood type.

**Supplemental Figure 5. Plasma EVs in all TPE treatment courses (including sessions requiring FFP).**

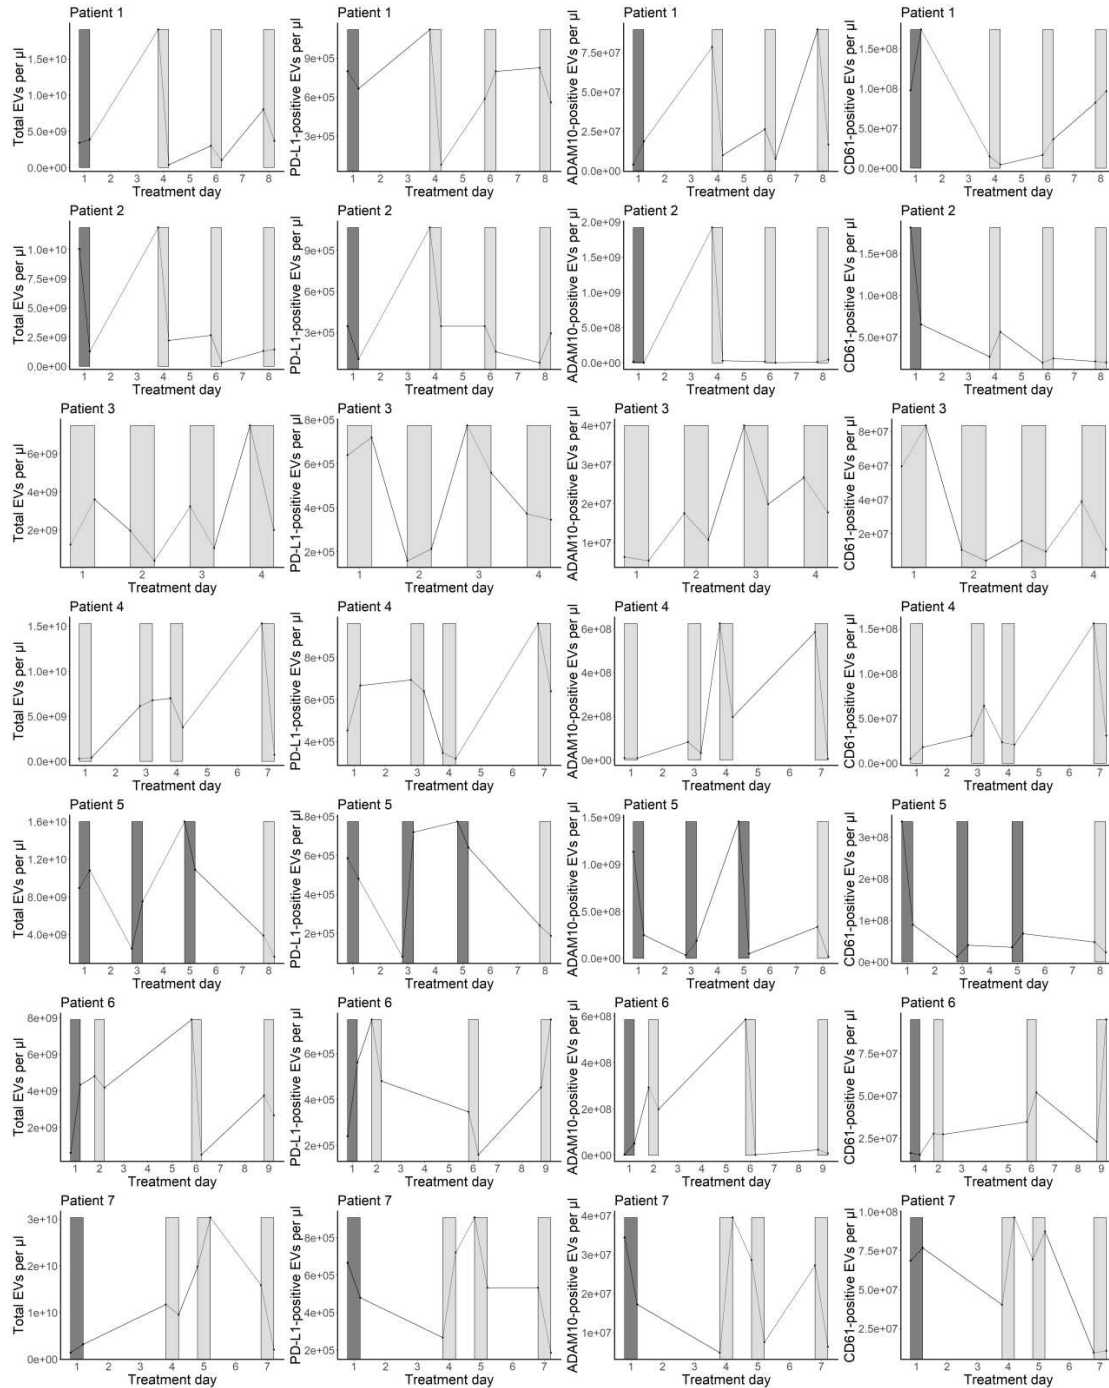

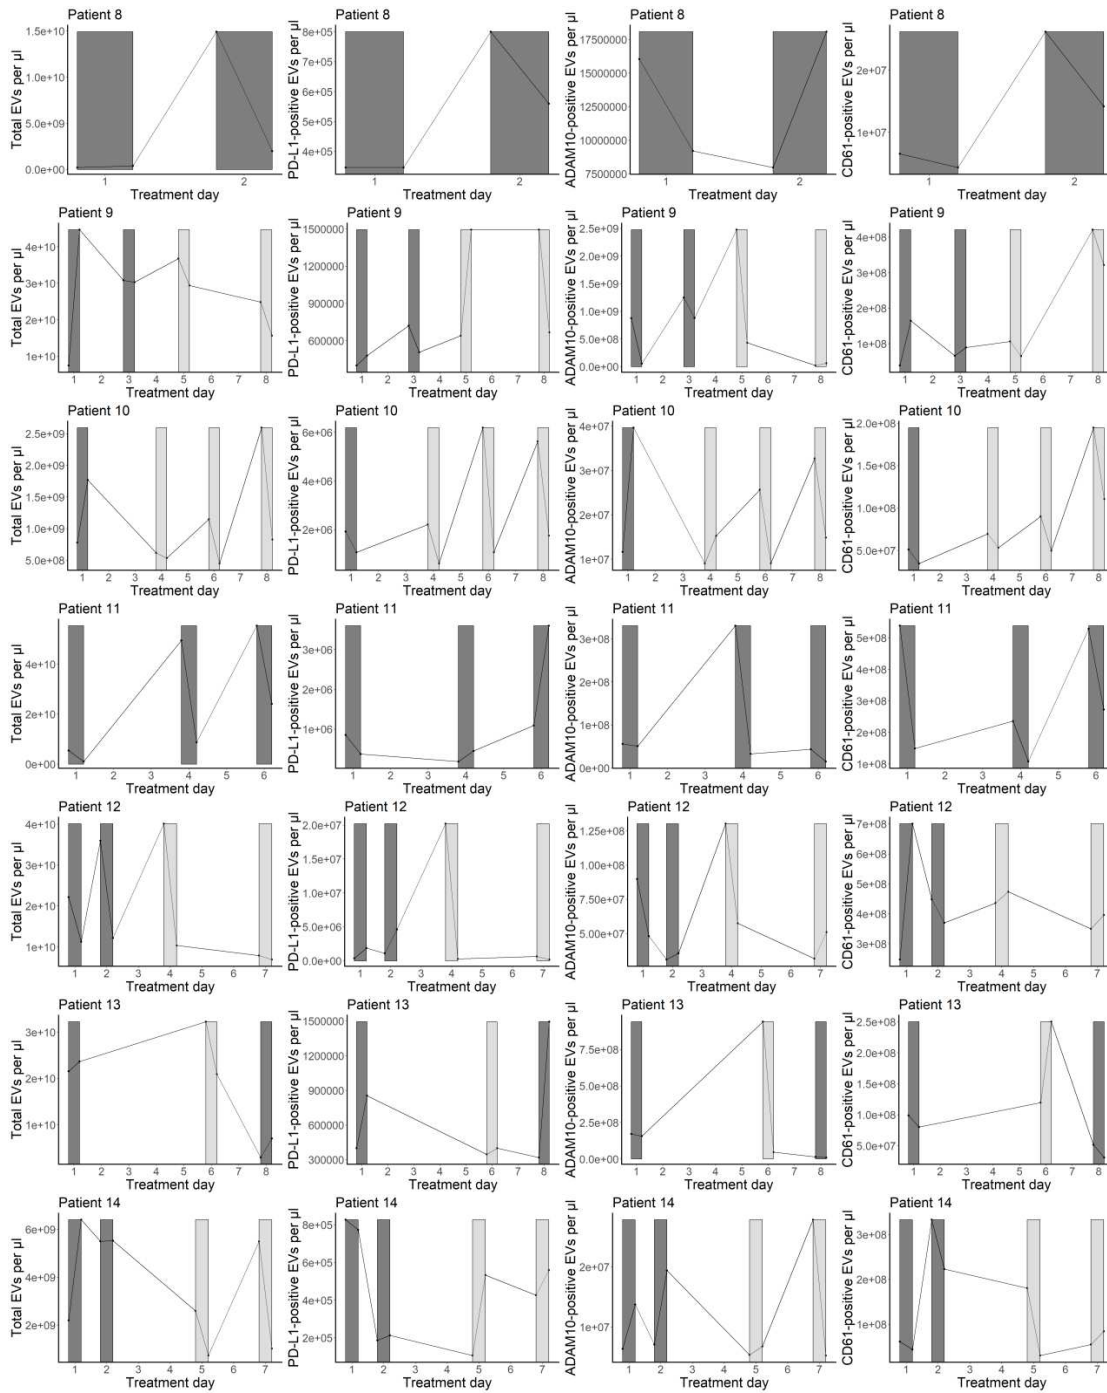



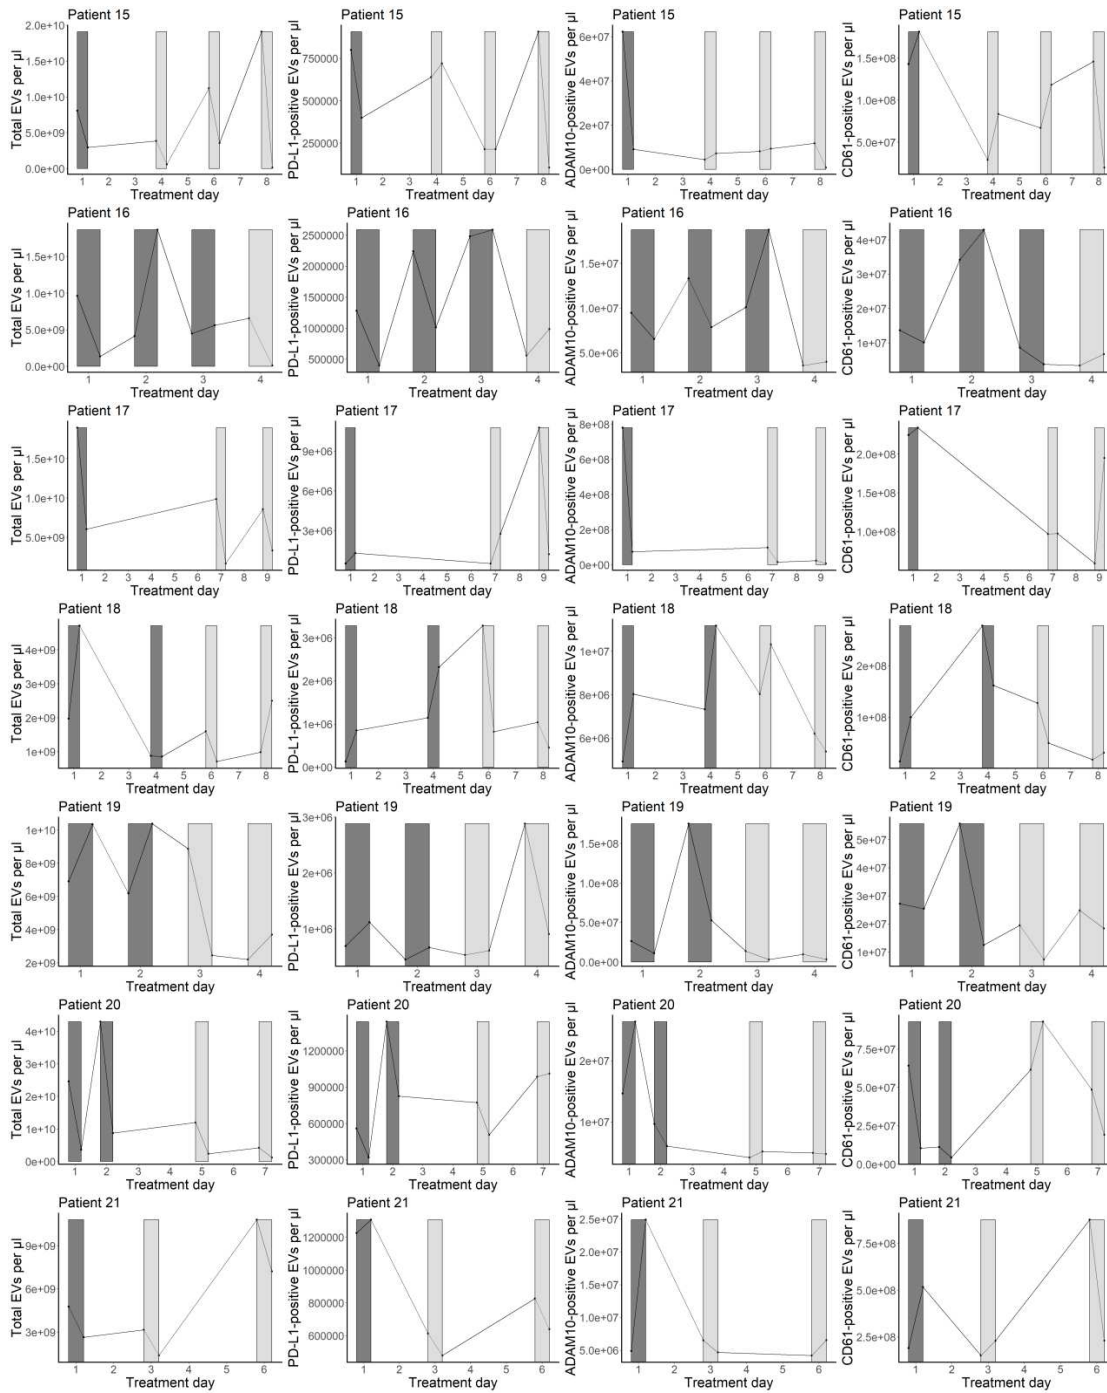

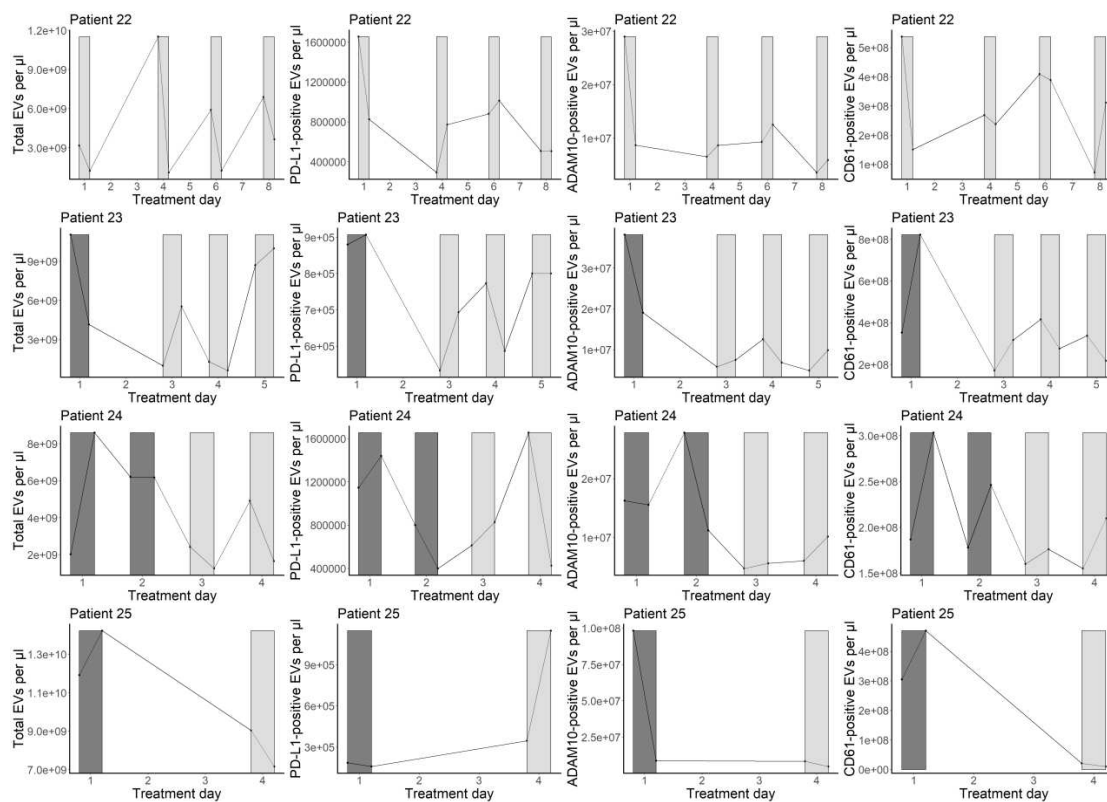

**Supplemental Figure 5. Plasma EVs in all TPE treatment courses (including sessions requiring FFP).** Plasma EV (total, PD-L1-positive, ADAM10-positive, and CD61-positive) levels over the course of TPE treatment are shown. Bars indicate TPE sessions, usually lasting 2 hours. Light-colored bars indicate that no FFP was received during the TPE session; conversely, dark bars indicate that FFP was received during the TPE session.

**Supplemental Figure 6. Example plasma EV nanoflow plots.**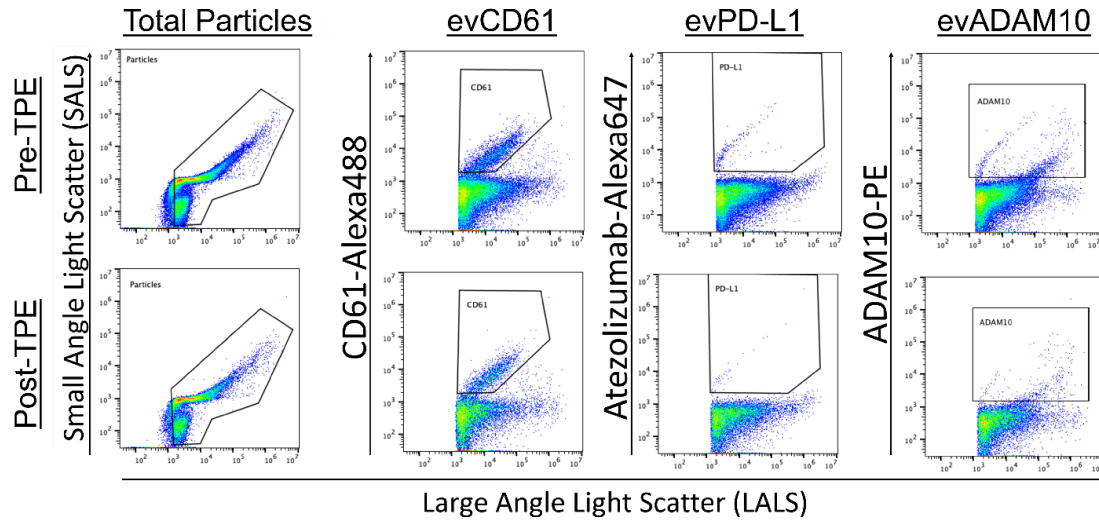**Supplemental Figure 6. Example plasma EV nanoflow plots.** Patient 10 pre- (top row) and post- (bottom row) TPE nanoflow cytometry detecting total EVs, evCD61, evPD-L1, and evADAM10.

**Supplemental Figure 7. Plasma EVs in all TPE treatment courses (including sessions requiring FFP).**

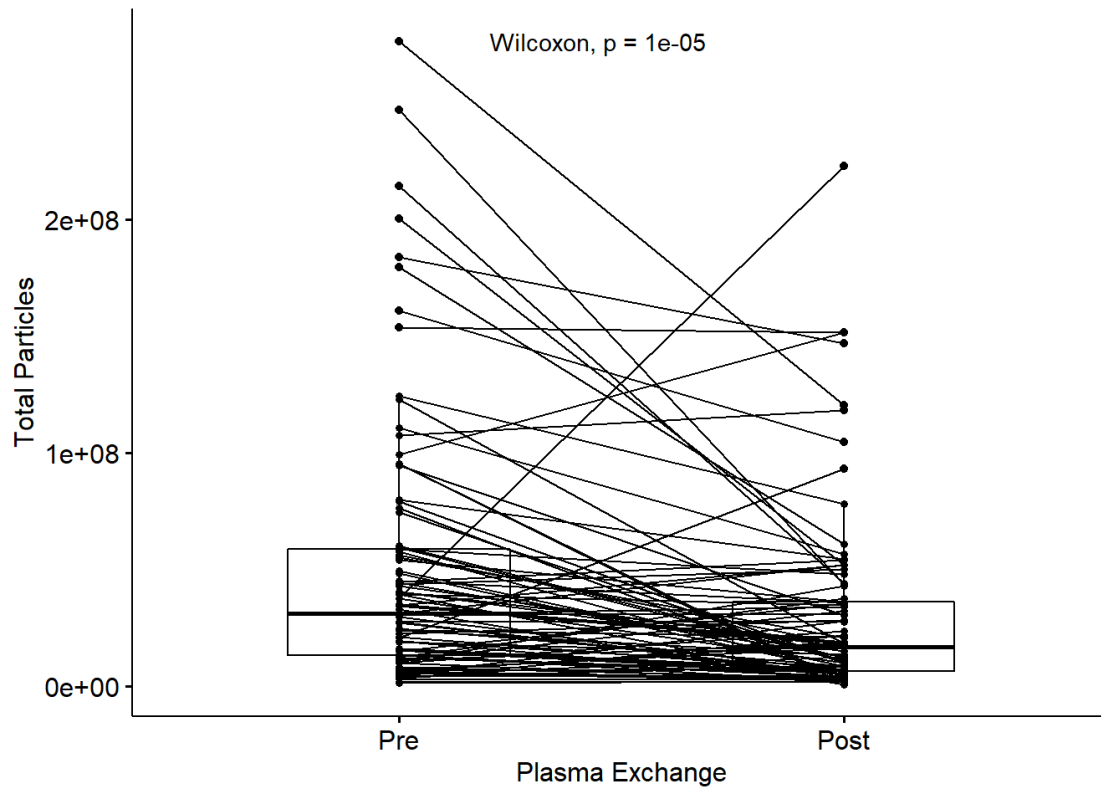

**Supplemental Figure 7. Plasma EVs in all TPE treatment courses (including sessions requiring FFP).** Plasma total EV per microliter levels over the course of TPE treatment are shown including those sessions in which FFP was received.

**Supplemental Figure 8. FFP donor EV concentrations do not correlate with blood type**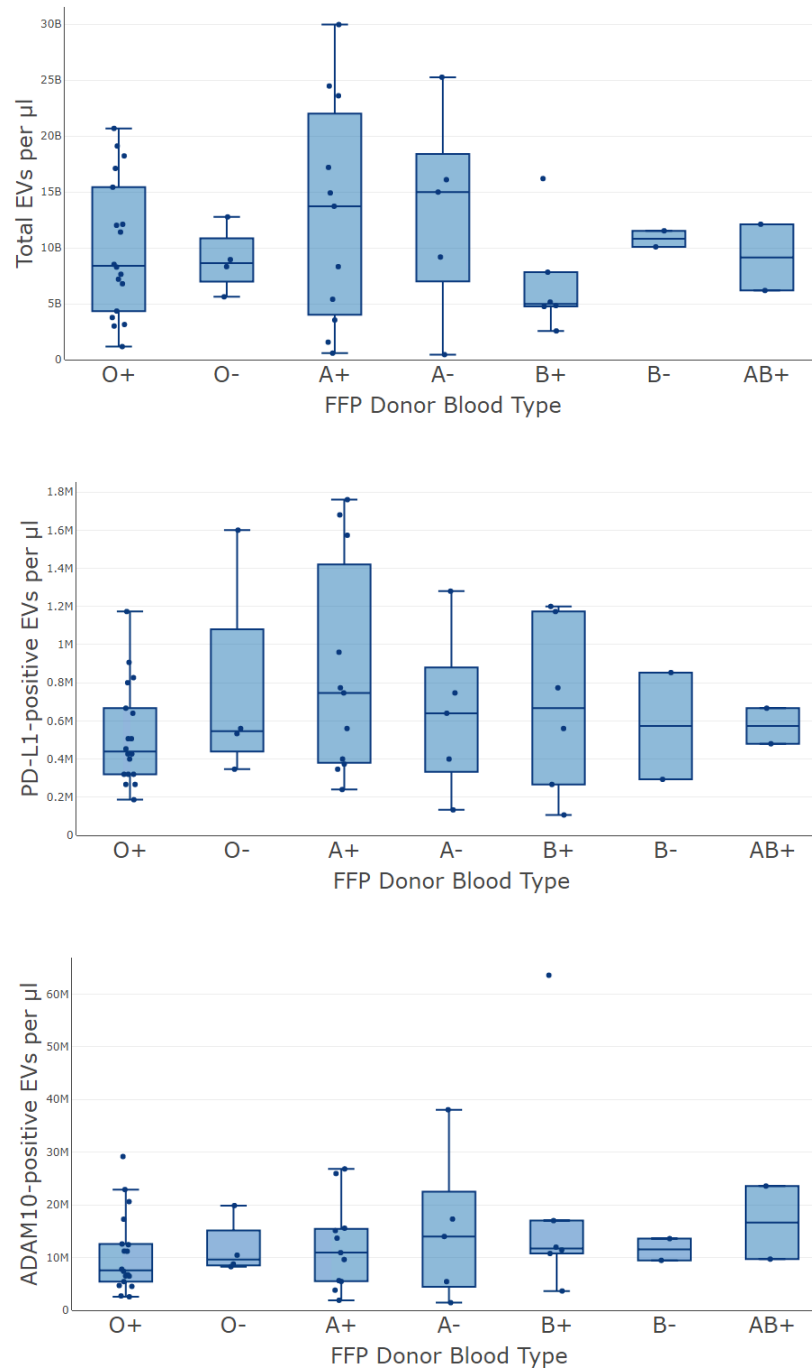

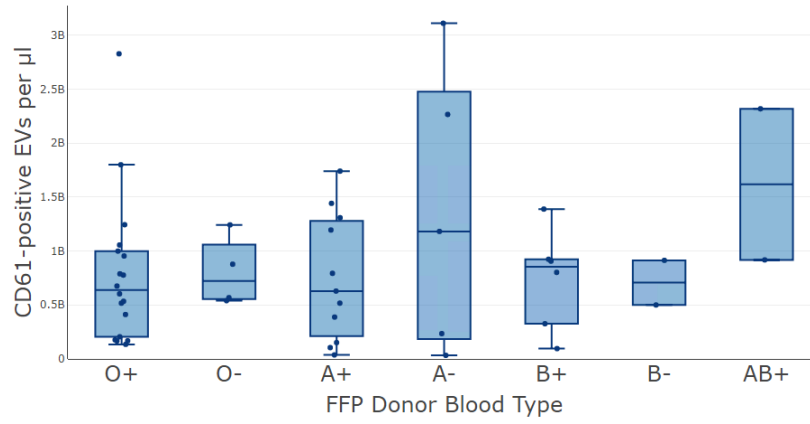

**Supplemental Figure 8. FFP donor EV concentrations do not correlate with blood type.**
